# Supplementary material for: Resveratrol modulates cocaine-induced inhibitory synaptic plasticity in VTA dopamine neurons by inhibiting phosphodiesterases (PDEs)
Source: PubMed Central journal article supplement (PMC5688096; doi:10.1038/s41598-017-16034-9), 2017-11-15
Supplement: 41598_2017_16034_MOESM1_ESM.pdf [file 41598_2017_16034_MOESM1_ESM.pdf]

**Resveratrol modulates cocaine-induced inhibitory synaptic plasticity in VTA  
dopamine neurons by inhibiting phosphodiesterases (PDEs)**

Yan Li<sup>1,2#</sup>, Laikang Yu<sup>1,2#</sup>, Li Zhao<sup>1\*</sup>, Fanxing Zeng<sup>1</sup>, and Qing-song Liu<sup>2\*</sup>

<sup>1</sup> Department of Exercise Physiology, Beijing Sport University, Beijing 100084, China

<sup>2</sup> Department of Pharmacology and Toxicology, Medical College of Wisconsin, 8701 Watertown  
Plank Road, Milwaukee, WI 53226, USA

# Y.L. and L.Y. contributed equally to this work.

\*Correspondence should be sent to:

Qing-song Liu, Ph.D., Department of Pharmacology and Toxicology, Medical College of  
Wisconsin, 8701 Watertown Plank Road, Milwaukee, WI 53226, USA

Email: [qslu@mcw.edu](mailto:qslu@mcw.edu)

Li Zhao, Ph.D., Department of Exercise Physiology, Beijing Sport University, Beijing 100084,  
China

Email: [zhaolispring@126.com](mailto:zhaolispring@126.com)

## Supplementary Materials

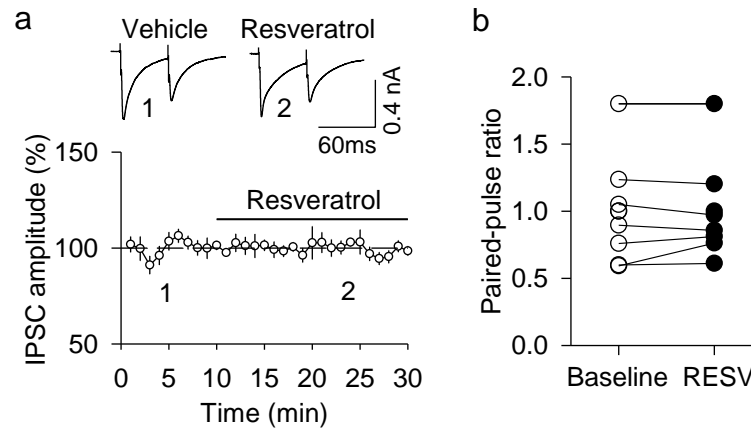

**Supplementary Figure S1.** Resveratrol at 10  $\mu\text{M}$  had no significant effect on GABA<sub>A</sub> receptor-IPSCs in VTA dopamine neurons. **a, b.** Bath application of resveratrol (10  $\mu\text{M}$ ) did not alter the amplitude (**a**) and PPR (**b**) of IPSCs ( $p = 0.331$ ,  $n = 6$ ).

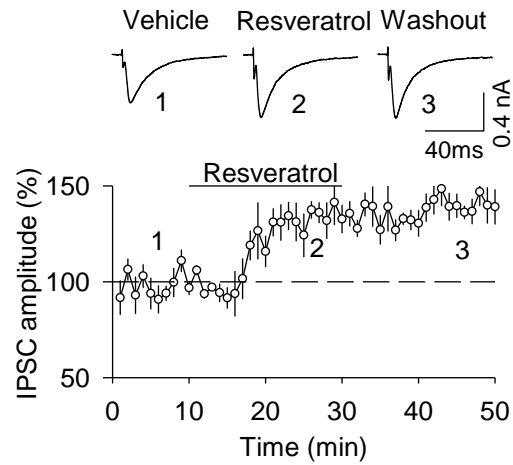

**Supplementary Figure S2.** The resveratrol-induced enhancement of IPSCs was not reversed during a 20 min washout period. Resveratrol (100  $\mu$ M) caused an increase in the amplitude of IPSCs ( $p < 0.001$ ,  $n = 7$ ). However, the potentiation was not reversed upon washout of resveratrol for 20 min ( $p = 0.110$  vs. resveratrol application,  $n = 7$ ).
